# Supplementary material for: Is a Diagnosis of Schizophrenia Spectrum Disorder Associated With Increased Mortality in Patients With COVID-19?
Source: Atypon-hosted journal article supplement (doi:10.1176/appi.ajp.2021.21020196), 2022-01-01
Supplement: appi.ajp.2021.21020196.ds001.pdf [file appi.ajp.2021.21020196.ds001.pdf]

Data supplement for Sánchez-Rico et al., Is a Diagnosis of Schizophrenia Spectrum Disorder Associated With Increased Mortality in Patients With COVID-19? *Am J Psychiatry* (doi: 10.1176/appi.ajp.2021.21020196)

The authors thank the EDS APHP Covid consortium integrating the APHP Health Data Warehouse team as well as all the APHP staff and volunteers who contributed to the implementation of the EDS-Covid database and operating solutions for this database. Collaborators of the EDS APHP Covid consortium: Pierre-Yves ANCEL, Alain BAUCHET, Nathanaël BEEKER, Vincent BENOIT, Mélodie BERNAUX, Ali BELLAMINE, Romain BEY, Aurélie BOURMAUD, Stéphane BREANT, Anita BURGUN, Fabrice CARRAT, Charlotte CAUCHETEUX, Julien CHAMP, Sylvie CORMONT, Christel DANIEL, Julien DUBIEL, Catherine DUCLOAS, Loic ESTEVE, Marie FRANK, Nicolas GARCELON, Alexandre GRAMFORT, Nicolas GRIFFON, Olivier GRISEL, Martin GUILBAUD, Claire HASSEN-KHODJA, François HEMERY, Martin HILKA, Anne Sophie JANNOT, Jerome LAMBERT, Richard LAYESE, Judith LEBLANC, Léo LEBOUTER, Guillaume LEMAITRE, Damien LEPROVOST, Ivan LERNER, Kankoe LEVI SALLAH, Aurélien MAIRE, Marie-France MAMZER, Patricia MARTEL, Arthur MENSCH, Thomas MOREAU, Antoine NEURAZ, Nina ORLOVA, Nicolas PARIS, Bastien RANCE, Hélène RAVERA, Antoine ROZES, Elisa SALAMANCA, Arnaud SANDRIN, Patricia SERRE, Xavier TANNIER, Jean-Marc TRELUYER, Damien VAN GYSEL, Gaël VAROQUAUX, Jill Jen VIE, Maxime WACK, Perceval WAJSBURT, Demian WASSERMANN, Eric ZAPLETAL.

**Ethics statement:** This observational study using routinely collected data received approval from the Institutional Review Board of the AP-HP clinical data warehouse (decision CSE-20-20\_COVID19, IRB00011591). AP-HP clinical Data Warehouse initiatives ensure patient information and informed consent regarding the different approved studies through a transparency portal in accordance with European Regulation on data protection and authorization n°1980120 from National Commission for Information Technology and Civil Liberties (CNIL).

**Data Availability Statement:** Data can be available at <https://eds.aphp.fr/> upon request from AP-HP Health Data Warehouse (Entrepôt de Données de Santé (EDS)). The authors did not have special access to the data that other researchers would not have.

**TABLE S1. Association of a diagnosis of schizophrenia spectrum disorder, demographic characteristics, and medical risk factors with mortality in adult patients hospitalized for COVID-19 (N=14,391)**

|                                                 | Full sample<br>(N=14,391) |       | With the<br>outcome<br>(N=1,301) |       | Without the<br>outcome<br>(N=13,090) |       | Crude logistic<br>regression analysis |             | Multivariable logistic<br>regression analysis <sup>a</sup> |              | Multivariable logistic<br>regression analysis <sup>b</sup> |              |
|-------------------------------------------------|---------------------------|-------|----------------------------------|-------|--------------------------------------|-------|---------------------------------------|-------------|------------------------------------------------------------|--------------|------------------------------------------------------------|--------------|
|                                                 | N                         | %     | N                                | %     | N                                    | %     | OR                                    | 95%CI       | AOR                                                        | 95%CI        | AOR                                                        | 95%CI        |
| Schizophrenia<br>spectrum disorder <sup>c</sup> |                           |       |                                  |       |                                      |       |                                       |             |                                                            |              |                                                            |              |
| <i>Yes</i>                                      | 80                        | 0.56% | 25                               | 31.2% | 55                                   | 68.8% | 4.64***                               | 2.88 - 7.48 | 4.05***                                                    | 2.41 - 6.83  | 1.54                                                       | 0.90 - 2.64  |
| <i>No</i>                                       | 14311                     | 99.4% | 1276                             | 8.92% | 13035                                | 91.1% | Ref.                                  | Ref.        | Ref.                                                       | Ref.         | Ref.                                                       | Ref.         |
| Age, y                                          |                           |       |                                  |       |                                      |       |                                       |             |                                                            |              |                                                            |              |
| 18 to 69                                        | 10409                     | 72.3% | 394                              | 3.79% | 10015                                | 96.2% | Ref.                                  | Ref.        | Ref.                                                       | Ref.         | Ref.                                                       | Ref.         |
| 70 to 79                                        | 1715                      | 11.9% | 342                              | 19.9% | 1373                                 | 80.1% | 6.33***                               | 5.42 - 7.40 | 5.42***                                                    | 4.63 - 6.35  | 4.33***                                                    | 3.67 - 5.12  |
| 80+                                             | 2267                      | 15.8% | 565                              | 24.9% | 1702                                 | 75.1% | 8.44***                               | 7.35 - 9.69 | 8.91***                                                    | 7.73 - 10.26 | 9.36***                                                    | 8.05 - 10.90 |
| Sex                                             |                           |       |                                  |       |                                      |       |                                       |             |                                                            |              |                                                            |              |
| <i>Women</i>                                    | 7585                      | 52.7% | 458                              | 6.04% | 7127                                 | 94.0% | Ref.                                  | Ref.        | Ref.                                                       | Ref.         | Ref.                                                       | Ref.         |
| <i>Men</i>                                      | 6806                      | 47.3% | 843                              | 12.4% | 5963                                 | 87.6% | 2.20***                               | 1.95 - 2.48 | 2.22***                                                    | 1.96 - 2.53  | 1.84***                                                    | 1.60 - 2.11  |
| Current smoking                                 |                           |       |                                  |       |                                      |       |                                       |             |                                                            |              |                                                            |              |
| <i>Yes</i>                                      | 1156                      | 8.03% | 188                              | 16.3% | 968                                  | 83.7% | 2.12***                               | 1.79 - 2.50 | 1.33**                                                     | 1.10 - 1.59  | 1.25*                                                      | 1.03 - 1.51  |
| <i>No</i>                                       | 13235                     | 92.0% | 1113                             | 8.41% | 12122                                | 91.6% | Ref.                                  | Ref.        | Ref.                                                       | Ref.         | Ref.                                                       | Ref.         |
| Obesity <sup>d</sup>                            |                           |       |                                  |       |                                      |       |                                       |             |                                                            |              |                                                            |              |
| <i>Yes</i>                                      | 1917                      | 13.3% | 301                              | 15.7% | 1616                                 | 84.3% | 2.14***                               | 1.86 - 2.46 | NA                                                         | NA           | 1.71***                                                    | 1.46 - 2.00  |
| <i>No</i>                                       | 12474                     | 86.7% | 1000                             | 8.02% | 11474                                | 92.0% | Ref.                                  | Ref.        | Ref.                                                       | Ref.         | Ref.                                                       | Ref.         |
| Number of medical<br>conditions <sup>e</sup>    |                           |       |                                  |       |                                      |       |                                       |             |                                                            |              |                                                            |              |
| 0                                               | 10967                     | 76.2% | 483                              | 4.40% | 10484                                | 95.6% | Ref.                                  | Ref.        | Ref.                                                       | Ref.         | Ref.                                                       | Ref.         |
| 1                                               | 744                       | 5.17% | 79                               | 10.6% | 665                                  | 89.4% | 2.58***                               | 2.01 - 3.31 | NA                                                         | NA           | 2.15***                                                    | 1.65 - 2.80  |
| 2+                                              | 2680                      | 18.6% | 739                              | 27.6% | 1941                                 | 72.4% | 8.26***                               | 7.30 - 9.36 | NA                                                         | NA           | 6.50***                                                    | 5.67 - 7.45  |

<sup>a</sup> Adjusted for age, sex, and current smoking (df=5).

<sup>b</sup> Adjusted for age, sex, current smoking, obesity, and number of medical conditions (df=8).

<sup>c</sup> Assessed using ICD-10 diagnosis codes for schizophrenia, schizotypal, delusional, and other non-mood psychotic disorders (F20-F29)

<sup>d</sup> Defined as having a body-mass index higher than 30 kg/m<sup>2</sup> or an International Statistical Classification of Diseases and Related Health Problems (ICD-10) diagnosis code for obesity (E66.0, E66.1, E66.2, E66.8, E66.9).

<sup>e</sup> Assessed using ICD-10 diagnosis codes for diabetes mellitus (E11), diseases of the circulatory system (I00-I99), diseases of the respiratory system (J00-J99), neoplasms (C00-D49), and diseases of the blood and blood-forming organs and certain disorders involving the immune mechanism (D5-D8).

\* Two-sided p-value is significant (p<0.05).

\*\* Two-sided p-value is significant (p<0.01).

\*\*\* Two-sided p-value is significant (p<0.01).

Abbreviations: OR; odds ratio; CI, confidence interval; AOR, adjusted odds ratio; NA, not applicable.

**TABLE S2. Association of a diagnosis of schizophrenia spectrum disorder, demographic characteristics, and medical risk factors with mortality in adult patients hospitalized for COVID-19 with psychiatric disorders (N=857)**

|                                                 | Full sample<br>(N=857) |       | With the<br>outcome<br>(N=326) |       | Without the<br>outcome<br>(N=531) |       | Crude logistic<br>regression analysis |             | Multivariable logistic<br>regression analysis <sup>a</sup> |              | Multivariable logistic<br>regression analysis <sup>b</sup> |              |
|-------------------------------------------------|------------------------|-------|--------------------------------|-------|-----------------------------------|-------|---------------------------------------|-------------|------------------------------------------------------------|--------------|------------------------------------------------------------|--------------|
|                                                 | N                      | %     | N                              | %     | N                                 | %     | OR                                    | 95%CI       | AOR                                                        | 95%CI        | AOR                                                        | 95%CI        |
| Schizophrenia<br>spectrum disorder <sup>a</sup> |                        |       |                                |       |                                   |       |                                       |             |                                                            |              |                                                            |              |
| <i>Yes</i>                                      | 80                     | 9.33% | 25                             | 31.2% | 55                                | 68.8% | 0.72                                  | 0.44 - 1.18 | 1.21                                                       | 0.71 - 2.08  | 1.22                                                       | 0.7 - 2.1    |
| <i>No</i>                                       | 777                    | 90.7% | 301                            | 38.7% | 476                               | 61.3% | Ref.                                  | Ref.        | Ref.                                                       | Ref.         | Ref.                                                       | Ref.         |
| Age, y                                          |                        |       |                                |       |                                   |       |                                       |             |                                                            |              |                                                            |              |
| 18 to 69                                        | 276                    | 32.2% | 44                             | 15.9% | 232                               | 84.1% | Ref.                                  | Ref.        | Ref.                                                       | Ref.         | Ref.                                                       | Ref.         |
| 70 to 79                                        | 187                    | 21.8% | 68                             | 36.4% | 119                               | 63.6% | 3.01***                               | 1.94 - 4.67 | 3.20***                                                    | 2.05 - 4.98  | 3.14***                                                    | 2.01 - 4.91  |
| 80+                                             | 394                    | 46.0% | 214                            | 54.3% | 180                               | 45.7% | 6.27***                               | 4.29 - 9.15 | 7.90***                                                    | 5.24 - 11.93 | 7.57***                                                    | 4.96 - 11.54 |
| Sex                                             |                        |       |                                |       |                                   |       |                                       |             |                                                            |              |                                                            |              |
| <i>Women</i>                                    | 419                    | 48.9% | 158                            | 37.7% | 261                               | 62.3% | Ref.                                  | Ref.        | Ref.                                                       | Ref.         | Ref.                                                       | Ref.         |
| <i>Men</i>                                      | 438                    | 51.1% | 168                            | 38.4% | 270                               | 61.6% | 1.03                                  | 0.78 - 1.35 | 1.75**                                                     | 1.27 - 2.42  | 1.71**                                                     | 1.23 - 2.38  |
| Current smoking                                 |                        |       |                                |       |                                   |       |                                       |             |                                                            |              |                                                            |              |
| <i>Yes</i>                                      | 155                    | 18.1% | 54                             | 34.8% | 101                               | 65.2% | 0.85                                  | 0.59 - 1.22 | 1.01                                                       | 0.67 - 1.51  | 0.97                                                       | 0.65 - 1.46  |
| <i>No</i>                                       | 702                    | 81.9% | 272                            | 38.7% | 430                               | 61.3% | Ref.                                  | Ref.        | Ref.                                                       | Ref.         | Ref.                                                       | Ref.         |
| Obesity                                         |                        |       |                                |       |                                   |       |                                       |             |                                                            |              |                                                            |              |
| <i>Yes</i>                                      | 167                    | 19.5% | 54                             | 32.3% | 113                               | 67.7% | 0.73                                  | 0.51 - 1.05 | NA                                                         | NA           | 1.05                                                       | 0.7 - 1.57   |
| <i>No</i>                                       | 690                    | 80.5% | 272                            | 39.4% | 418                               | 60.6% | Ref.                                  | Ref.        | Ref.                                                       | Ref.         | Ref.                                                       | Ref.         |
| Number of medical<br>conditions                 |                        |       |                                |       |                                   |       |                                       |             |                                                            |              |                                                            |              |
| 0                                               | 55                     | 6.42% | 8                              | 14.5% | 47                                | 85.5% | Ref.                                  | Ref.        | Ref.                                                       | Ref.         | Ref.                                                       | Ref.         |
| 1                                               | 100                    | 11.7% | 31                             | 31.0% | 69                                | 69.0% | 2.64*                                 | 1.12 - 6.24 | NA                                                         | NA           | 2.38                                                       | 0.97 - 5.84  |
| 2+                                              | 702                    | 81.9% | 287                            | 40.9% | 415                               | 59.1% | 4.06***                               | 1.89 - 8.73 | NA                                                         | NA           | 3.19**                                                     | 1.44 - 7.06  |

<sup>a</sup> Adjusted for age, sex, and current smoking (df=5).

<sup>b</sup> Adjusted for age, sex, current smoking, obesity, and number of medical conditions (df=8).

<sup>c</sup> Assessed using ICD-10 diagnosis codes for schizophrenia, schizotypal, delusional, and other non-mood psychotic disorders (F20-F29)

<sup>d</sup> Defined as having a body-mass index higher than 30 kg/m<sup>2</sup> or an International Statistical Classification of Diseases and Related Health Problems (ICD-10) diagnosis code for obesity (E66.0, E66.1, E66.2, E66.8, E66.9).

<sup>e</sup> Assessed using ICD-10 diagnosis codes for diabetes mellitus (E11), diseases of the circulatory system (I00-I99), diseases of the respiratory system (J00-J99), neoplasms (C00-D49), and diseases of the blood and blood-forming organs and certain disorders involving the immune mechanism (D5-D8).

\* Two-sided p-value is significant (p<0.05).

\*\* Two-sided p-value is significant (p<0.01).

\*\*\* Two-sided p-value is significant (p<0.01).

Abbreviations: OR; odds ratio; CI, confidence interval; AOR, adjusted odds ratio; NA, not applicable.
